# Supplementary material
Source: HighWire-hosted journal article supplement (https://bmjopen.bmj.com/content/12/5/e056875)
Supplement: inline-supplementary-material-1 [file inline-supplementary-material-1.pdf]

## Appendix 1. Possible equity extension items for STROBE.

| Section                     | Item No | Standard STROBE Checklist                                                                                                                                                                                                                                                                                                                                                                                                                                                          | Possible issues for STROBE equity extension (based on PRISMA-Equity and CONSORT-Equity reporting items)                                                                                                                                                                                                                                                                                           |
|-----------------------------|---------|------------------------------------------------------------------------------------------------------------------------------------------------------------------------------------------------------------------------------------------------------------------------------------------------------------------------------------------------------------------------------------------------------------------------------------------------------------------------------------|---------------------------------------------------------------------------------------------------------------------------------------------------------------------------------------------------------------------------------------------------------------------------------------------------------------------------------------------------------------------------------------------------|
| <b>Title and abstract</b>   | 1       |                                                                                                                                                                                                                                                                                                                                                                                                                                                                                    |                                                                                                                                                                                                                                                                                                                                                                                                   |
|                             |         | 1a. Indicate the study's design with a commonly used term in the title or the abstract                                                                                                                                                                                                                                                                                                                                                                                             |                                                                                                                                                                                                                                                                                                                                                                                                   |
|                             |         | 1b. Provide in the abstract an informative and balanced summary of what was done and what was found                                                                                                                                                                                                                                                                                                                                                                                | <ul style="list-style-type: none"> <li>- Describe population according to PROGRESS-Plus</li> <li>- Describe extent/limits of applicability to populations of interest across PROGRESS-Plus characteristics</li> </ul>                                                                                                                                                                             |
| <b>Background/rationale</b> | 2       |                                                                                                                                                                                                                                                                                                                                                                                                                                                                                    |                                                                                                                                                                                                                                                                                                                                                                                                   |
|                             |         | 2. Explain the scientific background and rationale for the investigation being reported                                                                                                                                                                                                                                                                                                                                                                                            | <ul style="list-style-type: none"> <li>- If equity is a focus, what is the rationale for focus on health equity?</li> </ul>                                                                                                                                                                                                                                                                       |
| <b>Objectives</b>           | 3       |                                                                                                                                                                                                                                                                                                                                                                                                                                                                                    |                                                                                                                                                                                                                                                                                                                                                                                                   |
|                             |         | 3. State specific objectives, including any pre specified hypotheses                                                                                                                                                                                                                                                                                                                                                                                                               |                                                                                                                                                                                                                                                                                                                                                                                                   |
| <b>Methods</b>              |         |                                                                                                                                                                                                                                                                                                                                                                                                                                                                                    |                                                                                                                                                                                                                                                                                                                                                                                                   |
| <b>Study design</b>         | 4       |                                                                                                                                                                                                                                                                                                                                                                                                                                                                                    |                                                                                                                                                                                                                                                                                                                                                                                                   |
|                             |         | 4. Present key elements of study design early in the paper                                                                                                                                                                                                                                                                                                                                                                                                                         | <ul style="list-style-type: none"> <li>- Report who was involved/engaged/consulted in study design (e.g. patients, community, industry, government, etc.)</li> <li>- Report whether a theory of change was described for the study to design analysis</li> </ul>                                                                                                                                  |
| <b>Setting</b>              | 5       |                                                                                                                                                                                                                                                                                                                                                                                                                                                                                    |                                                                                                                                                                                                                                                                                                                                                                                                   |
|                             |         | 5. Describe the setting, locations, and relevant dates, including periods of recruitment, exposure, follow-up, and data collection                                                                                                                                                                                                                                                                                                                                                 | <ul style="list-style-type: none"> <li>- Report whether methods of sampling/recruitment were designed to reach populations across relevant PROGRESS-Plus characteristics</li> <li>- Is there possibility of self-selection bias across PROGRESS-Plus factors?</li> </ul>                                                                                                                          |
| <b>Participants</b>         | 6       |                                                                                                                                                                                                                                                                                                                                                                                                                                                                                    |                                                                                                                                                                                                                                                                                                                                                                                                   |
|                             |         | <p>6a. <i>Cohort study</i>—Give the eligibility criteria, and the sources and methods of selection of participants. Describe methods of follow-up</p> <p><i>Case-control study</i>—Give the eligibility criteria, and the sources and methods of case ascertainment and control selection. Give the rationale for the choice of cases and controls</p> <p><i>Cross-sectional study</i>—Give the eligibility criteria, and the sources and methods of selection of participants</p> | <ul style="list-style-type: none"> <li>- Give inclusion and exclusion criteria across relevant PROGRESS-Plus characteristics</li> <li>- Report context and relationship to health equity (additional items may be needed to document context and systems in which the studies take place)</li> <li>- Report details of partnerships with populations and communities, where applicable</li> </ul> |

| Section                          | Item No | Standard STROBE Checklist                                                                                                                                                                                              | Possible issues for STROBE equity extension (based on PRISMA-Equity and CONSORT-Equity reporting items)                                                                                                                  |
|----------------------------------|---------|------------------------------------------------------------------------------------------------------------------------------------------------------------------------------------------------------------------------|--------------------------------------------------------------------------------------------------------------------------------------------------------------------------------------------------------------------------|
|                                  |         | 6b. <i>Cohort study</i> —For matched studies, give matching criteria and number of exposed and unexposed<br><i>Case-control study</i> —For matched studies, give matching criteria and the number of controls per case | - Report whether any PROGRESS-Plus factors used for matching, how categories were determined and why                                                                                                                     |
| <b>Variables</b>                 | 7       |                                                                                                                                                                                                                        |                                                                                                                                                                                                                          |
|                                  |         | 7. Clearly define all outcomes, exposures, predictors, potential confounders, and effect modifiers. Give diagnostic criteria, if applicable                                                                            | - Report whether outcomes were identified as relevant and important to populations across PROGRESS-Plus                                                                                                                  |
| <b>Data sources/ measurement</b> | 8       |                                                                                                                                                                                                                        |                                                                                                                                                                                                                          |
|                                  |         | 8.* For each variable of interest, give sources of data and details of methods of assessment (measurement). Describe comparability of assessment methods if there is more than one group                               | - Report the method of obtaining population characteristics (e.g. age)                                                                                                                                                   |
| <b>Bias</b>                      | 9       |                                                                                                                                                                                                                        |                                                                                                                                                                                                                          |
|                                  |         | 9. Describe any efforts to address potential sources of bias                                                                                                                                                           | - Report efforts to reduce selection bias across PROGRESS-Plus<br>- Report whether dimensions of context might influence the study (e.g. bias in response/participation)                                                 |
| <b>Study size</b>                | 10      |                                                                                                                                                                                                                        |                                                                                                                                                                                                                          |
|                                  |         | 10. Explain how the study size was arrived at                                                                                                                                                                          | - Report whether PROGRESS-Plus characteristics of interest were considered in determining the study size                                                                                                                 |
| <b>Quantitative variables</b>    | 11      |                                                                                                                                                                                                                        |                                                                                                                                                                                                                          |
|                                  |         | 11. Explain how quantitative variables were handled in the analyses. If applicable, describe which groupings were chosen and why                                                                                       | - Report how decisions were made about analyses related to PROGRESS-Plus, including whether any categories were defined, and how they were decided<br>- Report whether dimensions of context were collected for analysis |
| <b>ETHICAL CONCERNS</b>          | --      | --                                                                                                                                                                                                                     | New item in CONSORT-Equity, may be relevant to STROBE-Equity                                                                                                                                                             |
|                                  |         |                                                                                                                                                                                                                        | - Report details of informed consent and ethical clearance                                                                                                                                                               |
| <b>Statistical methods</b>       | 12      |                                                                                                                                                                                                                        |                                                                                                                                                                                                                          |
|                                  |         | 12a. Describe all statistical methods, including those used to control for confounding                                                                                                                                 | - If PROGRESS-Plus factors used to control for confounding, describe how they were defined and rationale<br>- Report whether contextual factors were used in adjustment for confounding                                  |
|                                  |         | 12b. Describe any methods used to examine subgroups and interactions                                                                                                                                                   | - Report details of additional analyses related to health equity<br>- Report whether context or systems were explored                                                                                                    |
|                                  |         | 12c. Explain how missing data were addressed                                                                                                                                                                           | - Explain whether missing data was related to individual or contextual factors associated with health inequities                                                                                                         |

| Section                 | Item No | Standard STROBE Checklist                                                                                                                                                                                                                                                                                  | Possible issues for STROBE equity extension (based on PRISMA-Equity and CONSORT-Equity reporting items)                                                                                             |
|-------------------------|---------|------------------------------------------------------------------------------------------------------------------------------------------------------------------------------------------------------------------------------------------------------------------------------------------------------------|-----------------------------------------------------------------------------------------------------------------------------------------------------------------------------------------------------|
|                         |         | 12d. <i>Cohort study</i> —If applicable, explain how loss to follow-up was addressed<br><i>Case-control study</i> —If applicable, explain how matching of cases and controls was addressed<br><i>Cross-sectional study</i> —If applicable, describe analytical methods taking account of sampling strategy |                                                                                                                                                                                                     |
|                         |         | 12e. Describe any sensitivity analyses                                                                                                                                                                                                                                                                     |                                                                                                                                                                                                     |
| <b>Results</b>          |         |                                                                                                                                                                                                                                                                                                            |                                                                                                                                                                                                     |
| <b>Participants</b>     | 13      |                                                                                                                                                                                                                                                                                                            |                                                                                                                                                                                                     |
|                         |         | 13a.* Report numbers of individuals at each stage of study—e.g. numbers potentially eligible, examined for eligibility, confirmed eligible, included in the study, completing follow-up, and analyzed                                                                                                      |                                                                                                                                                                                                     |
|                         |         | 13b.* Give reasons for non-participation at each stage                                                                                                                                                                                                                                                     | <ul style="list-style-type: none"> <li>- Describe the losses and exclusions of participants across PROGRESS-Plus</li> <li>- Describe non-response/non-participation across PROGRESS-Plus</li> </ul> |
|                         |         | 13c.* Consider use of a flow diagram                                                                                                                                                                                                                                                                       |                                                                                                                                                                                                     |
| <b>Descriptive data</b> | 14      |                                                                                                                                                                                                                                                                                                            |                                                                                                                                                                                                     |
|                         |         | 14a.* Give characteristics of study participants (e.g. demographic, clinical, social) and information on exposures and potential confounders                                                                                                                                                               | - Present characteristics across relevant PROGRESS-Plus characteristics                                                                                                                             |
|                         |         | 14b.* Indicate number of participants with missing data for each variable of interest                                                                                                                                                                                                                      | - Describe whether data on PROGRESS-Plus factors are missing (e.g. ethnicity data in some settings has a high level of missing-ness)                                                                |
|                         |         | 14c.* <i>Cohort study</i> —Summaries follow-up time (e.g., average and total amount)                                                                                                                                                                                                                       |                                                                                                                                                                                                     |
| <b>Outcome data</b>     | 15      |                                                                                                                                                                                                                                                                                                            |                                                                                                                                                                                                     |
|                         |         | 15.* <i>Cohort study</i> —Report numbers of outcome events or summary measures over time                                                                                                                                                                                                                   |                                                                                                                                                                                                     |
|                         |         | <i>Case-control study</i> —Report numbers in each exposure category, or summary measures of exposure                                                                                                                                                                                                       |                                                                                                                                                                                                     |
|                         |         | <i>Cross-sectional study</i> —Report numbers of outcome events or summary measures                                                                                                                                                                                                                         |                                                                                                                                                                                                     |
| <b>Main results</b>     | 16      |                                                                                                                                                                                                                                                                                                            |                                                                                                                                                                                                     |

| Section                  | Item No | Standard STROBE Checklist                                                                                                                                                                                       | Possible issues for STROBE equity extension (based on PRISMA-Equity and CONSORT-Equity reporting items)                                                                                                                                                                                                                                                                                                                                             |
|--------------------------|---------|-----------------------------------------------------------------------------------------------------------------------------------------------------------------------------------------------------------------|-----------------------------------------------------------------------------------------------------------------------------------------------------------------------------------------------------------------------------------------------------------------------------------------------------------------------------------------------------------------------------------------------------------------------------------------------------|
|                          |         | 16a. Give unadjusted estimates and, if applicable, confounder-adjusted estimates and their precision (e.g., 95% confidence interval). Make clear which confounders were adjusted for and why they were included | <ul style="list-style-type: none"> <li>- Report if confounders were defined for contextual or PROGRESS-Plus factors that are associated with health inequities</li> <li>- Justify why certain categories of PROGRESS-Plus are not disaggregated for analysis</li> </ul>                                                                                                                                                                             |
|                          |         | 16b. Report category boundaries when continuous variables were categorized                                                                                                                                      | <ul style="list-style-type: none"> <li>- Justify any categories used across PROGRESS-Plus characteristics</li> </ul>                                                                                                                                                                                                                                                                                                                                |
|                          |         | 16c. If relevant, consider translating estimates of relative risk into absolute risk for a meaningful time period                                                                                               |                                                                                                                                                                                                                                                                                                                                                                                                                                                     |
| <b>Other analysis</b>    | 17      |                                                                                                                                                                                                                 |                                                                                                                                                                                                                                                                                                                                                                                                                                                     |
|                          |         | 17. Report other analyses done—e.g. analyses of subgroups and interactions, and sensitivity analyses                                                                                                            | <ul style="list-style-type: none"> <li>- Report other analyses to address health equity questions, if the study had objectives related to health equity</li> </ul>                                                                                                                                                                                                                                                                                  |
| <b>Discussion</b>        |         |                                                                                                                                                                                                                 |                                                                                                                                                                                                                                                                                                                                                                                                                                                     |
| <b>Key results</b>       | 18      |                                                                                                                                                                                                                 |                                                                                                                                                                                                                                                                                                                                                                                                                                                     |
|                          |         | 18. Summaries key results with reference to study objectives                                                                                                                                                    |                                                                                                                                                                                                                                                                                                                                                                                                                                                     |
| <b>Limitations</b>       | 19      |                                                                                                                                                                                                                 |                                                                                                                                                                                                                                                                                                                                                                                                                                                     |
|                          |         | 19. Discuss limitations of the study, taking into account sources of potential bias or imprecision. Discuss both direction and magnitude of any potential bias                                                  |                                                                                                                                                                                                                                                                                                                                                                                                                                                     |
| <b>Interpretation</b>    | 20      |                                                                                                                                                                                                                 |                                                                                                                                                                                                                                                                                                                                                                                                                                                     |
|                          |         | 20a. Give a cautious overall interpretation of results considering objectives, limitations, multiplicity of analyses, results from similar studies, and other relevant evidence                                 | <ul style="list-style-type: none"> <li>- Consider importance of context in interpretation of health equity</li> </ul>                                                                                                                                                                                                                                                                                                                               |
| <b>Generalizability</b>  | 21      |                                                                                                                                                                                                                 |                                                                                                                                                                                                                                                                                                                                                                                                                                                     |
|                          |         | 21. Discuss the generalizability (external validity) of the study results                                                                                                                                       | <ul style="list-style-type: none"> <li>- Discuss external validity to populations across relevant PROGRESS-Plus characteristics, considering issues of possible self-selection, healthy volunteer bias, losses across PROGRESS-Plus</li> <li>- Consider implications of exclusion of people across PROGRESS as well as differential participation and/or loss to follow-up</li> <li>- Consider context in discussion of generalizability</li> </ul> |
| <b>Other information</b> |         |                                                                                                                                                                                                                 |                                                                                                                                                                                                                                                                                                                                                                                                                                                     |
| <b>Funding</b>           | 22      |                                                                                                                                                                                                                 |                                                                                                                                                                                                                                                                                                                                                                                                                                                     |

| Section                                                                                                                                                                 | Item No | Standard STROBE Checklist                                                                                                                                         | Possible issues for STROBE equity extension (based on PRISMA-Equity and CONSORT-Equity reporting items) |
|-------------------------------------------------------------------------------------------------------------------------------------------------------------------------|---------|-------------------------------------------------------------------------------------------------------------------------------------------------------------------|---------------------------------------------------------------------------------------------------------|
|                                                                                                                                                                         |         | 22. Give the source of funding and the role of the funders for the present study and, if applicable, for the original study on which the present article is based |                                                                                                         |
| *Give information separately for cases and controls in case-control studies and, if applicable, for exposed and unexposed groups in cohort and cross-sectional studies. |         |                                                                                                                                                                   |                                                                                                         |
