# Supplementary material
Source: HighWire-hosted journal article supplement (https://bmjopen.bmj.com/content/12/5/e056875)
Supplement: inline-supplementary-material-3 [file inline-supplementary-material-3.pdf]

### Appendix 3. Grey Literature sources.

#### Funding Agencies:

Australian Research Council

<http://www.arc.gov.au/>

Australian National Health and Medical Research Council

<https://www.nhmrc.gov.au/>

Canadian Institutes of Health Research

<http://www.cihr-irsc.gc.ca/e/193.html>

Social Sciences and Humanities Research Council

[www.sshrc-crsh.gc.ca](http://www.sshrc-crsh.gc.ca)

National Institutes of Health

<https://grants.nih.gov/funding/index.htm>

Patient-Centered Outcomes Research Institute

<https://www.pcori.org/funding-opportunities>

European Commission

<https://ec.europa.eu/research/health/index.cfm>

National Institute of Economic and Social Research

<https://www.niesr.ac.uk/>

Health Research Council of New Zealand

<https://www.hrc.govt.nz/>

Other sources:

Institute of Health Economics (IHE). Publications Library

<http://www.ihe.ca/index.php?/publications>

Agency for Healthcare Research and Quality (AHRQ). Evidence-based Practice

<http://www.ahrq.gov/research/findings/evidence-based-reports/search.html>

Institute for Clinical and Economic Review (ICER).

<http://www.icer-review.org/index.php/Table/Appraisals/>

TRIP Database (TRIP). Trip Database - Clinical Search Engine

<http://www.tripdatabase.com/>

National Institute for Health and Care Excellence (NICE). Evidence Search: Health and Social Care

<http://www.evidence.nhs.uk/>

University of York. PROSPERO: International prospective register of systematic reviews

<http://www.crd.york.ac.uk/prospero/search.asp>

Campbell Collaboration website

<https://www.campbellcollaboration.org/>

Cochrane website

<http://www.cochrane.org/>
